# Supplementary material for: Ordered magnetic core–manganese oxide shell nanostructures and their application in water treatment
Source: Royal Society of Chemistry journal article supplement (doi:10.1039/b912767d), 2009-01-01
Supplement: b912767d.pdf [file b912767d.pdf]

## Supporting Information

# Ordered Magnetic Core-Manganese Oxide Shell Nanostructures and Their Application in Water Treatment

*Yueming Zhai, Junfeng Zhai, Ming Zhou and Shaojun Dong\**

State Key Laboratory of Electroanalytical Chemistry, Changchun Institute of Applied Chemistry,  
Chinese Academy of Sciences, Graduate School of the Chinese Academy of Sciences, Changchun  
130022, Jilin, PR China

E-mail: [dongsj@ciac.jl.cn](mailto:dongsj@ciac.jl.cn)

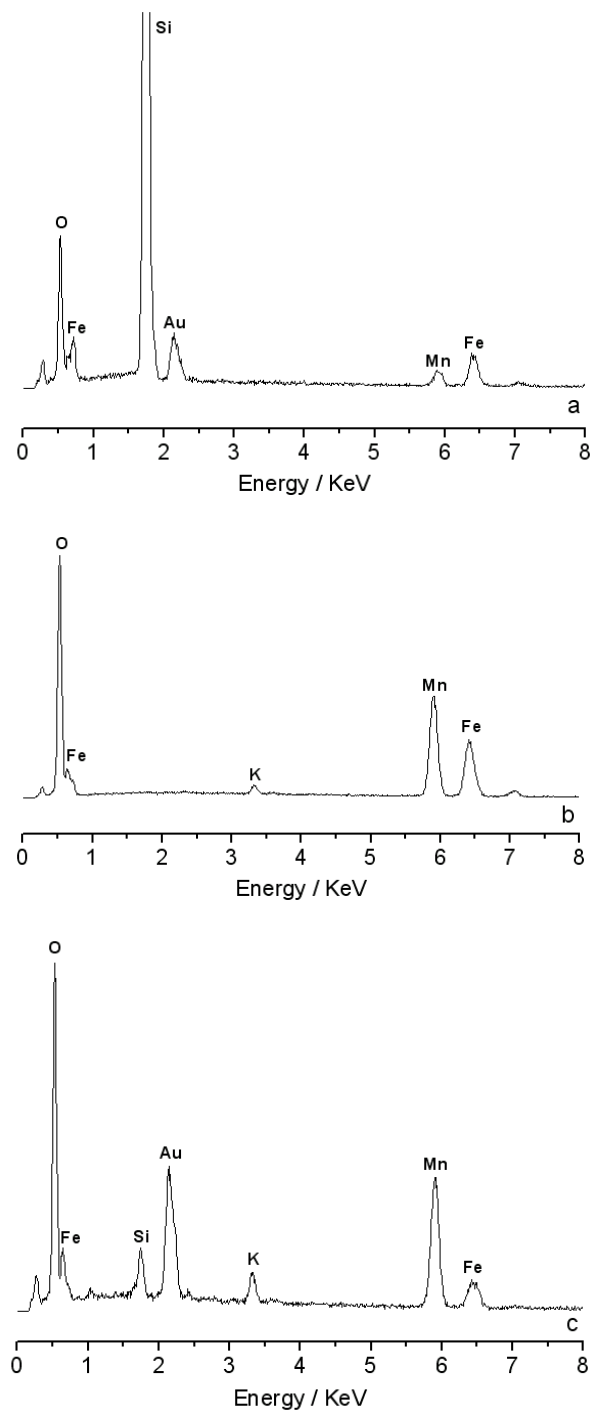

Figure S1. EDX spectra taken on the representative samples (a) sample 1; (b) sample 3; (c) sample 4.

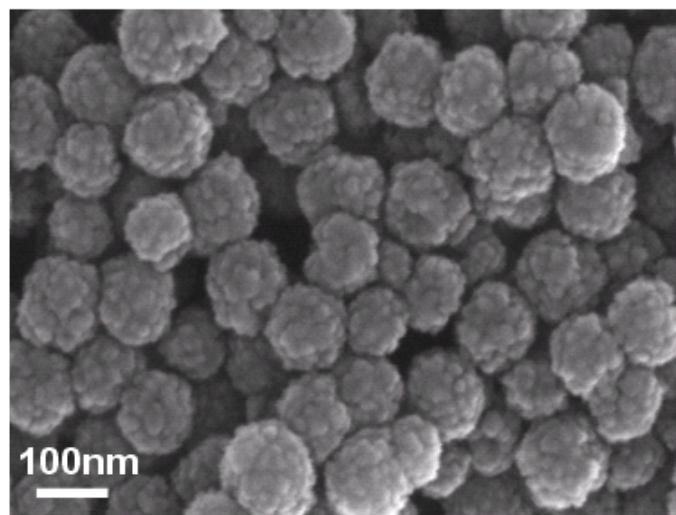

Figure S2. Typical SEM images of sample 2.
